# Supplementary material for: Molybdenum disulfide nanosheets-based fluorescent “off-to-on” probe for targeted monitoring and inhibition of β-amyloid oligomers
Source: Royal Society of Chemistry journal article supplement (doi:10.1039/d0an00019a), 2020-01-01
Supplement: d0an00019a1.pdf [file d0an00019a1.pdf]

## Supporting Information

### **Molybdenum disulfide nanosheets based fluorescent off-to-on probe for targeted monitoring and inhibition of $\beta$ -amyloid oligomers**

Lingna Kong,<sup>1</sup> Xinguang Zhou,<sup>1</sup> Guoyue Shi,<sup>1\*</sup> Yanyan Yu<sup>2\*</sup>

<sup>1</sup> School of Chemistry and Molecular Engineering, Shanghai Key Laboratory for Urban Ecological Processes and Eco-Restoration, East China Normal University, 500 Dongchuan Road, Shanghai 200241, P. R. China

<sup>2</sup> Jiangsu Key Laboratory of New Drug Research and Clinical Pharmacy, Xuzhou Medical University, 209 Tongshan Road, Xuzhou 221004, Jiangsu, P.R.China

## **Animal experiments**

All operations involving animals were approved by the Animal Ethics Committee of East China Normal University in China. Female APP/PS1 double transgenic mice (4 months aged, weight ranging from 20 to 30 g) were purchased from Zhishan (Beijing) Health Medical Research Institute Co., Ltd. They were placed in plastic cages and maintained under standard environmental conditions (12 h light / dark cycle, 22°C) with food and water ad libitum. For the preparations of brain tissue samples, the mice were immediately executed by cervical vertebra luxation after being anesthetized with 150  $\mu$ L 10% chloral hydrate, then the brain tissue including prefrontal cortex and hippocampus were respectively peeled off and homogenated with 20 mM Tris-HCl (pH = 7.4) buffer solution at 5,000 r/min. After that, the suspensions were centrifuged at 12,000 r/min (4°C) for 10 min and the supernatants were collected for the following experiments. When not in use, the homogenates should be stored at -20°C.

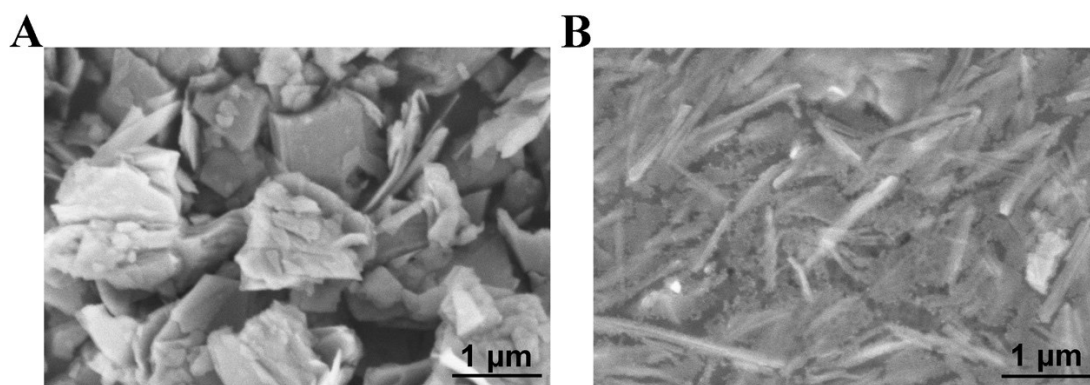

**Figure S1.** SEM images of (A) MoS<sub>2</sub> powders and (B) MoS<sub>2</sub> NSs.

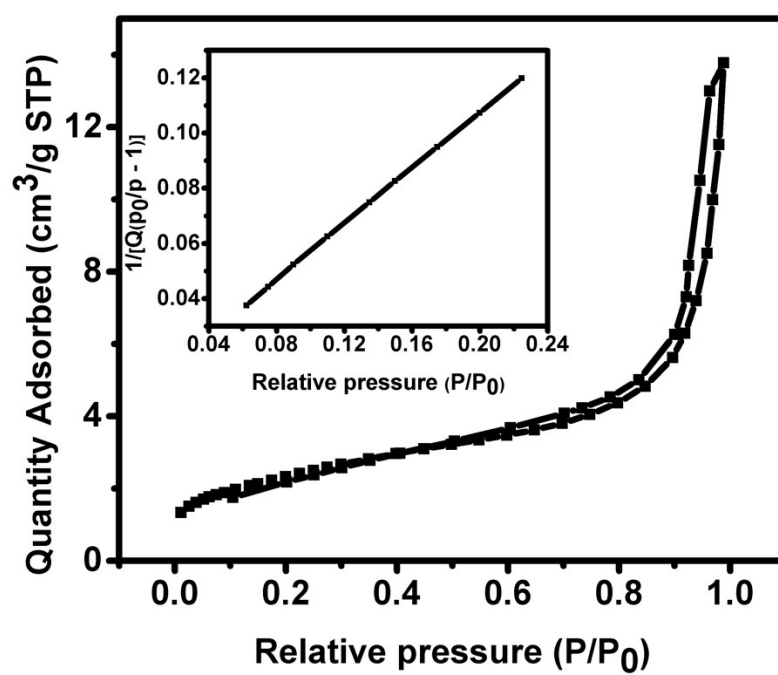

**Figure S2.** N<sub>2</sub> adsorption–desorption isotherm of MoS<sub>2</sub> powders.

**Optimization of the detection conditions:** The large surface area of MoS<sub>2</sub> NSs made it possible to absorb enough amount of ss-DNA and subsequently quench the fluorescence of FAM-ssDNA to a large extent. To evaluate the fluorescence quenching efficiency of MoS<sub>2</sub> NSs to FAM-ssDNA, MoS<sub>2</sub> NSs with different final concentrations (0, 0.005, 0.02, 0.1, 0.15, 0.2, 0.3, 0.4 and 0.5 mg/mL) were added to 100 nM FAM-ssDNA contained Tris-HCl buffer and incubated for 20 min. The fluorescence intensity at 520 nm was collected using a micro plate reader. As shown in the inset graph in Figure S3A, the intensity at 520 nm decreased gradually with increasing MoS<sub>2</sub> NSs ranging from 0 to 0.1 mg/mL and began to level off when the concentration was higher than 0.1 mg/mL. According to the tendency curve shown in inset of Figure S3A, 0.1 mg/mL MoS<sub>2</sub> NSs was finally set as the optimal concentration in this work to quench the fluorescence of 100 nM ssDNA unless otherwise stated.

Additionally, the incubation time between MoS<sub>2</sub> / FAM-ssDNA and A $\beta$  was considered to be another important parameter for the following experiments, which would directly affect the release efficiency of ssDNA from the surface of MoS<sub>2</sub> NSs and a sufficient incubation time was significant for obtaining a high analytical performance. As shown in Figure S3B, the fluorescence intensity at 520 nm was gradually increased with time and mainly leveled off at the time of 30 min. Since then, continuing extending the incubation time had no obvious effect on the enhancement of intensity. Hence, 30 min was considered as the optimal incubation time for the recognition of A $\beta$  and linkage of FAM-ssDNA from MoS<sub>2</sub> NSs throughout the whole experiments.

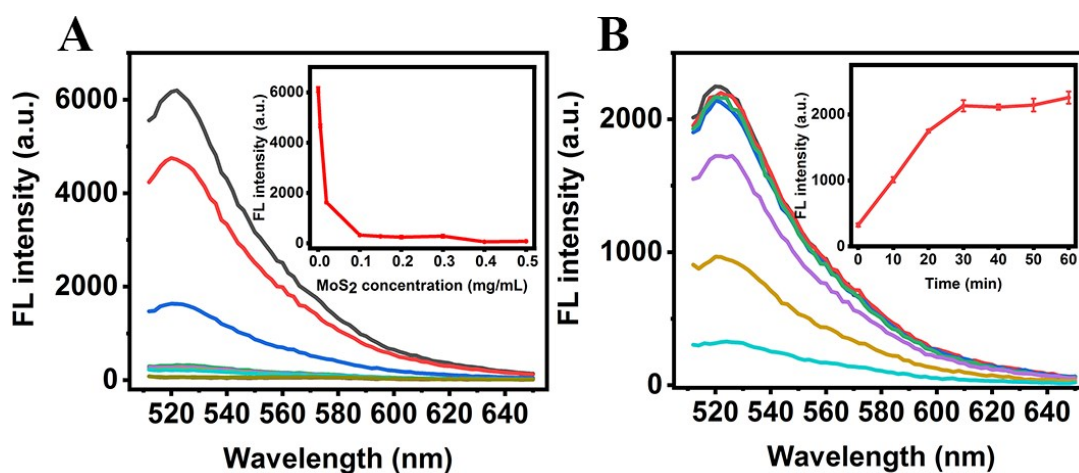

**Figure S3.** (A) Fluorescence spectra of 100 nM FAM-ssDNA incubated with various concentrations of MoS<sub>2</sub> NSs (0, 0.005, 0.02, 0.1, 0.2, 0.3, 0.4 and 0.5 mg/mL) for 20 min. (B) Fluorescence spectra of 10 μM Aβ<sub>0</sub> incubated with MoS<sub>2</sub> /FAM-ssDNA for different time. Excitation: 480 nm.

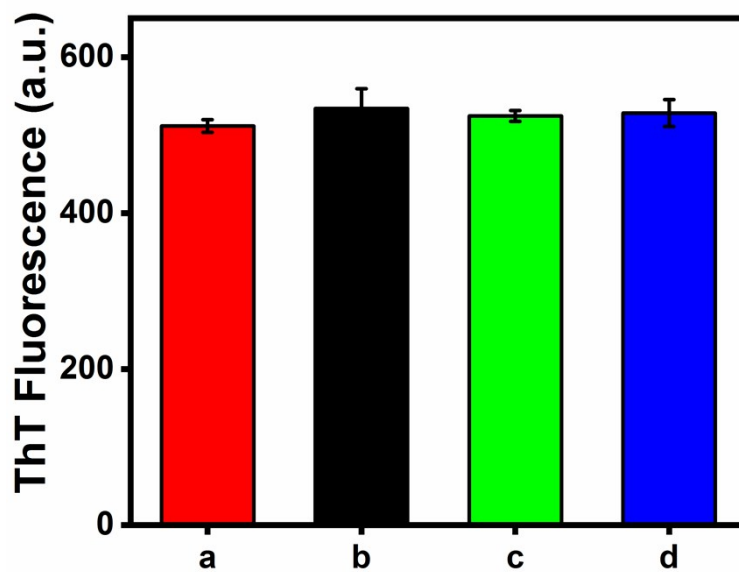

**Figure S4.** Effect of MoS<sub>2</sub> NSs concentrations on ThT fluorescence. Concentrations of MoS<sub>2</sub> NSs were 0 (a), 10 μg/mL (b), 20 μg/mL (c) and 50 μg/mL (d).
